# Supplementary material for: Impact of pharmacokinetic enhancement strategies on the antimicrobial and antioxidant activities of hydroxytyrosol
Source: Royal Society of Chemistry journal article supplement (doi:10.1039/d4ra08205b), 2025-01-01
Supplement: d4ra08205b1.pdf [file d4ra08205b1.pdf]

## ***Supplementary Information***

### **Impact of Pharmacokinetic Enhancement Strategies on the Antimicrobial and Antioxidant Activities of Hydroxytyrosol**

Giuliana Prevete,<sup>a</sup> Elisa Scipioni,<sup>a</sup> Enrica Donati,<sup>a</sup> Noemi Villanova,<sup>b</sup> Andrea Fochetti,<sup>b</sup> Laura Lilla,<sup>a</sup> Stefano Borocci,<sup>c,d</sup> Roberta Bernini,<sup>b\*</sup> and Marco Mazzonna.<sup>a\*</sup>

<sup>a</sup> CNR-Institute for Biological Systems (ISB), Research Area of Rome 1, Strada Provinciale 35d, n. 9, 00010 - Montelibretti (Roma), Italy

<sup>b</sup> Department of Agriculture and Forest Sciences (DAFNE), University of Tuscia, 01100 Viterbo, Italy

<sup>c</sup> Department for Innovation in Biological, Agrofood and Forest Systems (DIBAF), University of Tuscia, 01100 Viterbo, Italy

<sup>d</sup> CNR-Institute for Biological Systems (ISB) - Secondary Office of Rome-Reaction Mechanisms c/o Department of Chemistry, La Sapienza University of Rome, Rome, Italy

\* Corresponding author: [roberta.bernini@unitus.it](mailto:roberta.bernini@unitus.it); [marco.mazzonna@cnr.it](mailto:marco.mazzonna@cnr.it)

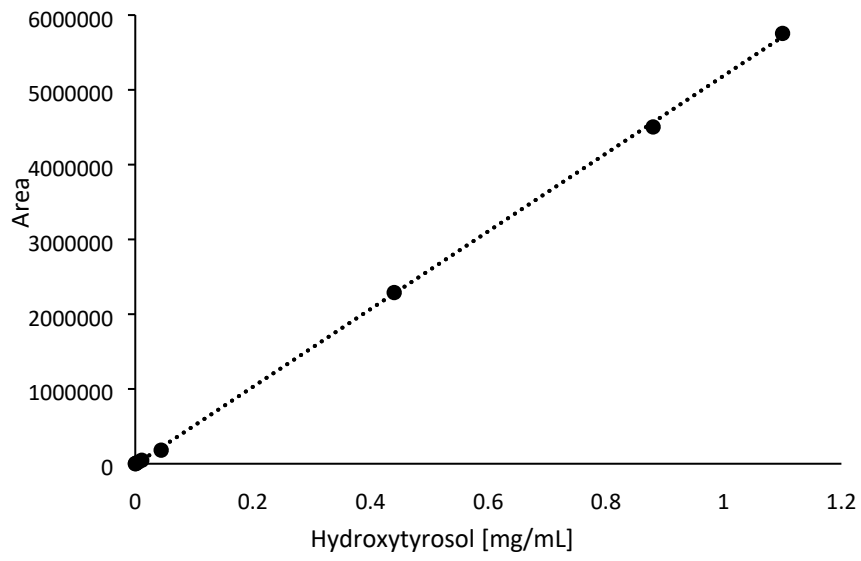

**Figure S1.** Hydroxytyrosol calibration curve.

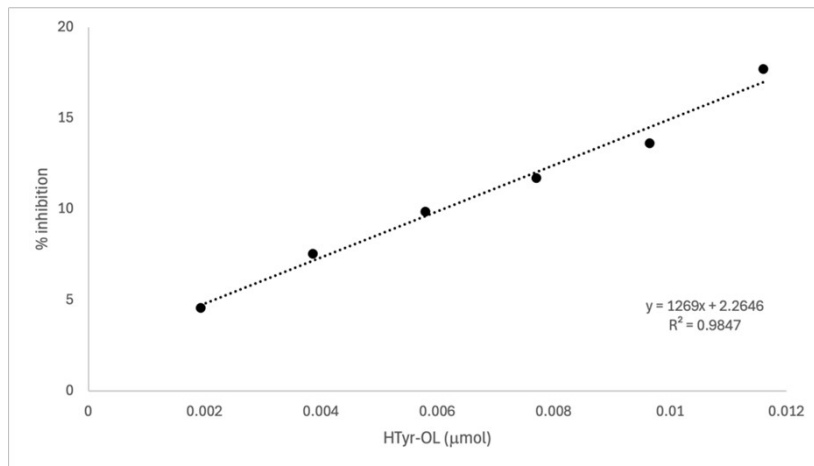

**Figure S2.** Hydroxytyrosol oleate calibration curve.

**Table S1.** Stability over time of developed liposomes.

| Formulation | Time (day) | D <sub>h</sub> (nm) | PDI         | Formulation | Time (day) | D <sub>h</sub> (nm) | PDI         |
|-------------|------------|---------------------|-------------|-------------|------------|---------------------|-------------|
| <b>F1</b>   | 1          | 119 ± 1             | 0.09 ± 0.01 | <b>F2</b>   | 1          | 130 ± 1             | 0.04 ± 0.02 |
|             | 7          | 119 ± 1             | 0.07 ± 0.02 |             | 7          | 131 ± 2             | 0.03 ± 0.02 |
|             | 14         | 120 ± 2             | 0.08 ± 0.01 |             | 14         | 130 ± 2             | 0.04 ± 0.01 |
|             | 21         | 120 ± 1             | 0.09 ± 0.02 |             | 21         | 130 ± 1             | 0.03 ± 0.02 |
|             | 28         | 119 ± 2             | 0.08 ± 0.01 |             | 28         | 130 ± 1             | 0.04 ± 0.01 |
| <b>F3</b>   | 1          | 129 ± 1             | 0.09 ± 0.01 | <b>F4</b>   | 1          | 116 ± 2             | 0.14 ± 0.01 |
|             | 7          | 128 ± 1             | 0.11 ± 0.01 |             | 7          | 121 ± 3             | 0.17 ± 0.01 |
|             | 14         | 134 ± 1             | 0.17 ± 0.01 |             | 14         | 122 ± 1             | 0.18 ± 0.01 |
|             | 21         | 132 ± 1             | 0.15 ± 0.02 |             | 21         | 120 ± 2             | 0.15 ± 0.01 |
|             | 28         | 137 ± 1             | 0.20 ± 0.02 |             | 30         | 122 ± 2             | 0.15 ± 0.01 |
| <b>F5</b>   | 1          | 95 ± 3              | 0.13 ± 0.01 | <b>F6</b>   | 1          | 110 ± 3             | 0.08 ± 0.01 |
|             | 7          | 97 ± 2              | 0.11 ± 0.02 |             | 7          | 106 ± 1             | 0.06 ± 0.02 |
|             | 14         | 98 ± 2              | 0.11 ± 0.01 |             | 13         | 109 ± 1             | 0.07 ± 0.02 |
|             | 21         | 97 ± 2              | 0.12 ± 0.02 |             | 21         | 110 ± 1             | 0.05 ± 0.02 |
|             | 28         | 103 ± 1             | 0.14 ± 0.01 |             | 30         | 111 ± 1             | 0.13 ± 0.01 |
| <b>F7</b>   | 1          | 104 ± 3             | 0.06 ± 0.01 | <b>F8</b>   | 1          | 119 ± 4             | 0.06 ± 0.01 |
|             | 7          | 101 ± 2             | 0.07 ± 0.01 |             | 7          | 120 ± 2             | 0.06 ± 0.01 |
|             | 14         | 100 ± 2             | 0.06 ± 0.02 |             | 14         | 123 ± 1             | 0.09 ± 0.01 |
|             | 21         | 101 ± 1             | 0.10 ± 0.02 |             | 21         | 121 ± 1             | 0.07 ± 0.02 |
|             | 28         | 109 ± 1             | 0.11 ± 0.02 |             | 28         | 125 ± 1             | 0.12 ± 0.02 |
| <b>F9</b>   | 1          | 96 ± 2              | 0.08 ± 0.02 | <b>F10</b>  | 1          | 94 ± 1              | 0.04 ± 0.01 |
|             | 7          | 95 ± 2              | 0.08 ± 0.02 |             | 7          | 94 ± 1              | 0.05 ± 0.01 |
|             | 14         | 98 ± 1              | 0.07 ± 0.01 |             | 14         | 94 ± 1              | 0.06 ± 0.02 |
|             | 21         | 99 ± 1              | 0.08 ± 0.01 |             | 21         | 96 ± 1              | 0.07 ± 0.01 |
|             | 28         | 98 ± 1              | 0.09 ± 0.02 |             | 28         | 97 ± 3              | 0.05 ± 0.01 |
| <b>F11</b>  | 1          | 99 ± 1              | 0.14 ± 0.02 | <b>F12</b>  | 1          | 111 ± 1             | 0.08 ± 0.01 |
|             | 7          | 129 ± 1             | 0.43 ± 0.02 |             | 7          | 111 ± 1             | 0.08 ± 0.01 |
|             | 14         | n.d.                | n.d.        |             | 14         | 112 ± 1             | 0.09 ± 0.01 |
|             | 21         | n.d.                | n.d.        |             | 21         | 113 ± 1             | 0.08 ± 0.02 |
|             | 28         | n.d.                | n.d.        |             | 28         | 113 ± 1             | 0.10 ± 0.01 |

n.d. = not determined

**Table S2.** Stability of developed liposomes under pH variations.

| Formulation | pH * | D <sub>h</sub> (nm) | PDI           | Formulation | pH * | D <sub>h</sub> (nm) | PDI           |
|-------------|------|---------------------|---------------|-------------|------|---------------------|---------------|
| <b>F1</b>   | 2.9  | 100.9 ± 0.4         | 0.11 ± 0.02   | <b>F2</b>   | 2.9  | 129.7 ± 1           | 0.04 ± 0.01   |
|             | 5.7  | 107 ± 1             | 0.19 ± 0.01   |             | 5.7  | 129 ± 1             | 0.03 ± 0.01   |
|             | 6.4  | 102 ± 1             | 0.12 ± 0.02   |             | 6.4  | 134 ± 1             | 0.10 ± 0.01   |
|             | 7.4  | 100.4 ± 0.5         | 0.10 ± 0.01   |             | 7.4  | 130 ± 1             | 0.03 ± 0.01   |
|             | 8    | 102.0 ± 0.3         | 0.11 ± 0.01   |             | 8    | 129 ± 1             | 0.04 ± 0.01   |
| <b>F3</b>   | 2.9  | 129 ± 1             | 0.09 ± 0.01   | <b>F4</b>   | 2.9  | 104 ± 4             | 0.09 ± 0.01   |
|             | 5.7  | 133 ± 1             | 0.121 ± 0.004 |             | 5.7  | 104 ± 3             | 0.08 ± 0.01   |
|             | 6.4  | 130 ± 2             | 0.15 ± 0.02   |             | 6.4  | 103 ± 3             | 0.09 ± 0.01   |
|             | 7.4  | 131 ± 1             | 0.12 ± 0.02   |             | 7.4  | 104 ± 2             | 0.085 ± 0.004 |
|             | 8    | 133 ± 1             | 0.16 ± 0.02   |             | 8    | 104 ± 3             | 0.09 ± 0.02   |
| <b>F5</b>   | 2.9  | 125 ± 4             | 0.09 ± 0.02   | <b>F6</b>   | 2.9  | 118 ± 4             | 0.05 ± 0.02   |
|             | 5.7  | 119 ± 2             | 0.02 ± 0.01   |             | 5.7  | 118 ± 3             | 0.07 ± 0.03   |
|             | 6.4  | 118 ± 4             | 0.03 ± 0.01   |             | 6.4  | 117 ± 5             | 0.07 ± 0.02   |
|             | 7.4  | 119 ± 4             | 0.05 ± 0.01   |             | 7.4  | 122 ± 4             | 0.08 ± 0.02   |
|             | 8    | 121 ± 2             | 0.05 ± 0.02   |             | 8    | 119 ± 3             | 0.06 ± 0.03   |
| <b>F12</b>  | 2.9  | 120 ± 1             | 0.16 ± 0.01   |             |      |                     |               |
|             | 5.7  | 111 ± 1             | 0.07 ± 0.01   |             |      |                     |               |
|             | 6.4  | 113 ± 1             | 0.08 ± 0.01   |             |      |                     |               |
|             | 7.4  | 111 ± 1             | 0.07 ± 0.01   |             |      |                     |               |
|             | 8    | 110 ± 2             | 0.08 ± 0.02   |             |      |                     |               |

\* Incubation times: 1-3 min for pH 5.7, 30 min-3 h for pH 2.9, 3 h for pH 6.4, 24 h for pH 8.
